# Supplementary material
Source: HighWire-hosted journal article supplement (http://www.cmaj.ca/highwire/filestream/58228/field_highwire_adjunct_files/1/know-clark-2-at_online.pdf)
Supplement: know-clark-2-at_online.pdf [file know-clark-2-at_online.pdf]

**Appendix 2: Responses from 101 Members of Parliament and senior aides when asked what came to mind when they heard the term “health research”**

| Response                                                       | % of times response was mentioned* |
|----------------------------------------------------------------|------------------------------------|
| Cures or treatments of disease, new practices                  | 57.4                               |
| Identification of health risks, cause of disease, epidemiology | 23.9                               |
| Disease prevention                                             | 22.8                               |
| Pharmaceutical research, clinical trials                       | 21.8                               |
| Health promotion and improvement                               | 16.8                               |
| New technology                                                 | 6.9                                |
| Effectiveness of current treatments                            | 6.9                                |
| Innovation                                                     | 6.9                                |
| Prioritization of health care needs                            | 5.0                                |
| Involvement of a variety of groups and funding agencies        | 5.0                                |
| Health care delivery                                           | 3.0                                |
| Cost-effectiveness of health care                              | 3.0                                |
| Biomedical research                                            | 3.0                                |
| Other†                                                         | 23.8                               |

\*Percentages do not add to 100 because multiple responses were allowed.

†“Other” represents 16 unique answers, each mentioned by no more than 2 respondents.
